# Supplementary material
Source: PubMed Central journal article supplement (PMC2957216)

# Supplementary Figure S1

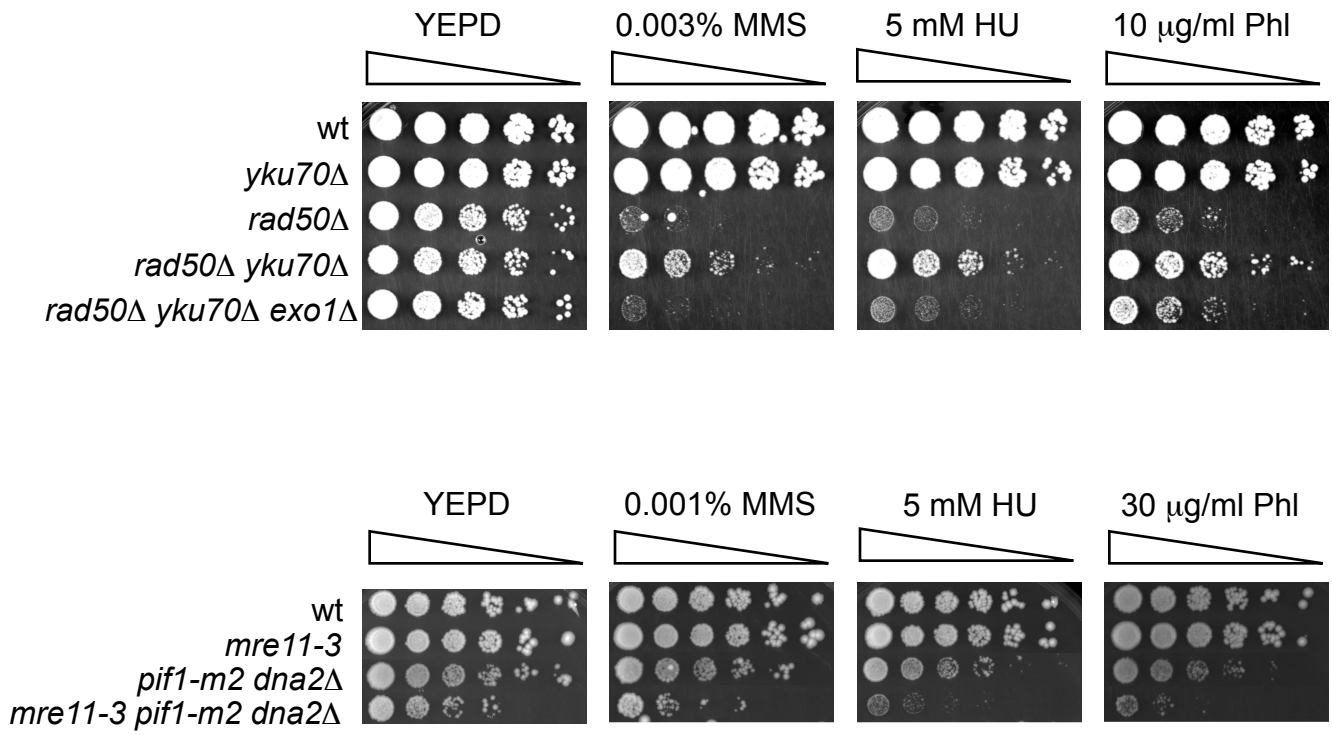

# Supplementary Figure S2

## Ku70/Ku80

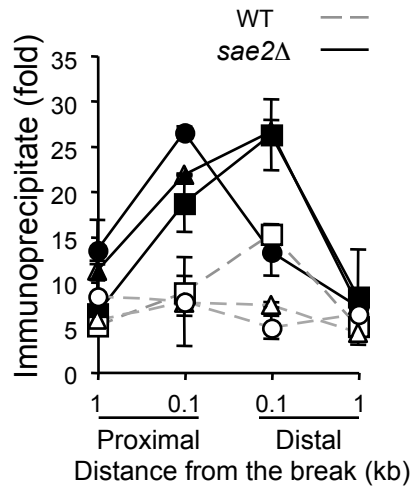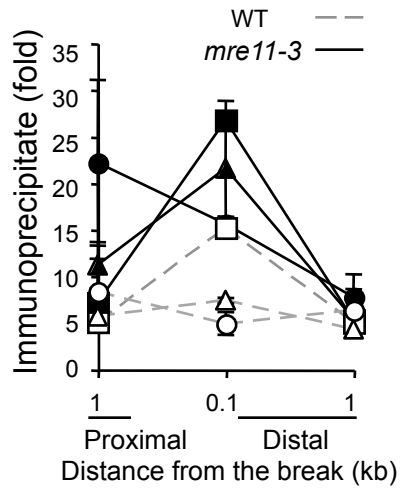

# Supplementary Figure S3

## DNA2-9Myc

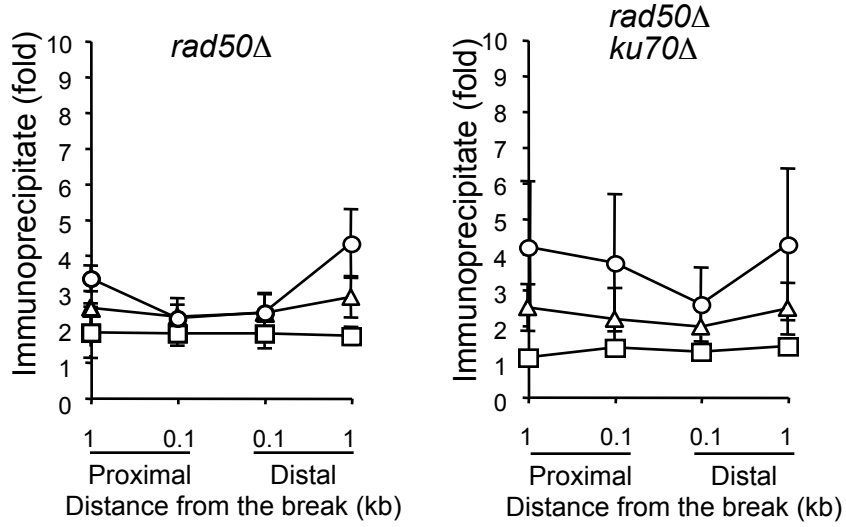

## Supplementary Figure S4

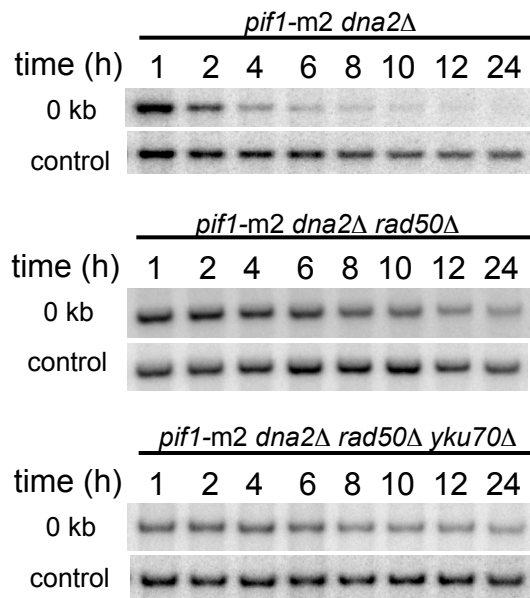

# Supplementary Figure S5

## Ku70/80

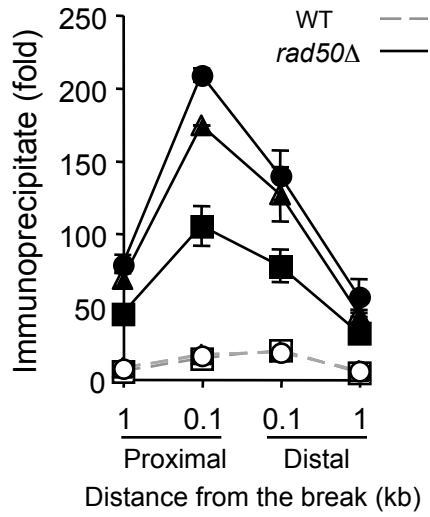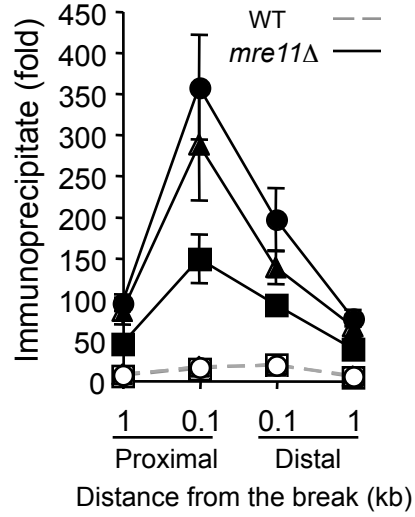

Supplement: emboj2010219s1.pdf [file emboj2010219s1.pdf]
